# Supplementary material for: Transient Receptor Potential C4/5 Like Channel Is Involved in Stretch-Induced Spontaneous Uterine Contraction of Pregnant Rat
Source: PubMed Central journal article supplement — Korean J Physiol Pharmacol. 2014 Dec 30;18(6):503–8. doi: 10.4196/kjpp.2014.18.6.503 (PMC4296040; doi:10.4196/kjpp.2014.18.6.503), 2014-12-30
Supplement: kjpp-18-503-s002.pdf [file kjpp-18-503-s002.pdf]

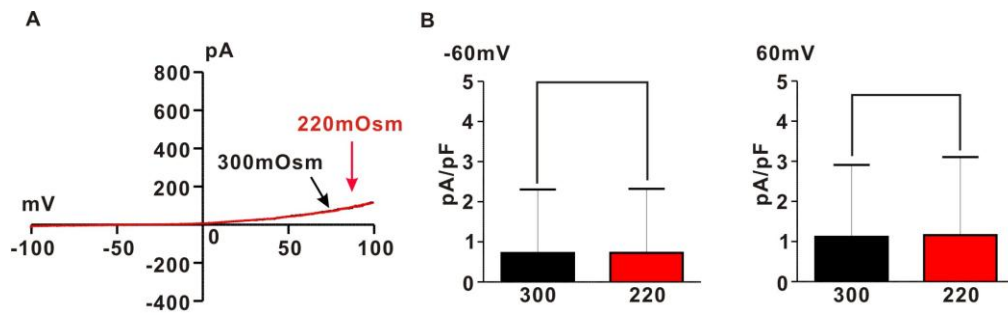

Supplementary Fig. 2

**Figure S2 Ionic selectivity of hypoosmotic swelling- induced outward**

**rectifying current in rat pregnant myocyte.** Bath solution 120 mM NMDG<sup>+</sup>.

(A) I–V relationship of hypoosmotic swelling-induced current. (B) summary of normalized amplitude of hypoosmotic swelling-induced current. The current amplitudes in each groups were measured at –60 and +60 mV respectively.
